# Supplementary material for: Molecular Population Genetics of Accessory Gland Protein Genes and Testis-Expressed Genes in Drosophila mojavensis and D. arizonae
Source: Oxford University Press journal article supplement (doi:10.1534/genetics.105.043372), 2005-08-06
Supplement: supplemental_data_wagstaff_and_begun_2006.doc [file supplemental_data_wagstaff_and_begun_2006.doc]

# Molecular Population Genetics of Accessory Gland Protein Genes and Testis-expressed Genes in *Drosophila mojavensis* and *D. arizonae*

**Supplementary Material**

Supplementary Text 1 Analysis of *D. mojavensis-D. melanogaster* orthology

*Tes14*:tBLASTn analysis of *Tes14* to predicted *D. melanogaster* genes produces a significant hit (E = 1e-25) to *CG8446*. However, the match is not to the *CG8446* coding sequence (CDS). Instead, the putative termination codon of the unannotated match is separated from the initiation codon of *CG8446* by 978 bp. Our protein alignment suggested a *D. melanogaster* ortholog with two coding exons of identical size to *D. mojavensis* *Tes14*, separated by a single 89 bp intron. Furthermore, the corresponding proteins in both species are 80 residues in length and the alignment is 68.8% identical with no gaps. However, this putative CDS in *D. melanogaster* includes intron splice sites that are not consistent with *CG8446* mRNA, suggesting a different mRNA species must be responsible for this unannotated *D. melanogaster* gene. To be precise, the predicted *D. melanogaster* ortholog CDS is a subset of the *CG8446* mRNA, except for an included 26 bp sequence that is part of an intron that is spliced out of *CG8446* mRNA. In fact, 5’ RACE of *D. melanogaster* cDNA proves this exact splice exists, as suggested by our computational analysis. Additionally, relative expression differences between these two *D. melanogaster* mRNA species show that the putative *Tes14* ortholog is testis-enriched, while *CG8446* is not (supplementary Table S2; http://www.genetics.org/supplemental). Therefore, we believe the *D. melanogaster* sequence in question is an unannotated gene and is orthologous to *Tes14*.

*Tes118*: *Tes118* shows evidence of orthology to unannotated *D. melanogaster* sequence that is not part of the genome assembly (Release 3.1). The “all Drosophila sequences” database retuned a significant tBLASTn match (E = 3e-12) to a chromosome 2 clone (ACO16129) while BLAST searches of predicted genes and chromosome arms returned no significant results. The tBLASTn match covered two distinct sections of protein sequence. The first tBLASTn hit covered residues 7-96 of our *D. mojavensis Tes118* protein sequence (E = 3e-12, 49.4% protein similarity). The second tBLASTn hit covered residues 120-312 (E = 5e-11, 37.9% protein similarity). There are 134 bp in *D. melanogaster* between tBLASTn hits, showing preserved microsynteny with the 7-96 residue match 5’ of the 120-312 residue sequence. However, there are in-frame stop codons within this sequence, indicating the likely presence of an intron. We do not have *D. mojavensis* population genetics data covering the genomic sequence with the putative intron. However, the dual, microsyntenous tBLASTn matches are a strong indication of *D. melanogaster**-D. mojavensis* orthology.

*Tes100 and Tes115:* The lack of BLAST similarity of many *D. mojavensis* genes to *D. melanogaster* sequences does not preclude orthology (Wagstaff and Begun 2005). We were able to use *D. mojavensis* genomic sequence data from our phage library to identify a *Tes100*/*Tes115* ortholog in *D. melanogaster*. *Tes100* and *Tes115*, the two most frequently sequenced ESTs in our testis cDNA library (supplementary Table S1; http://www.genetics.org/supplemental), showed no BLAST similarity to *D. melanogaster* sequence databases. Our genomic sequence data covers 19.6 kb and is derived from a phage clone that was detected via hybridization to 32P-labeled *Tes100* genomic DNA. We confirmed the presence of *Tes100* within this sequence. Moreover, *Tes115* was also detected with 1422 bp of intergenic sequence separating the termination codon of *Tes100* from the initiation codon of *Tes115*. *Tes100* and *Tes115* contain two coding exons, with the CDS of the first exon covering 58 bp in each gene. The protein sequences are 50% identical (28/56) across alignable residues. *Tes100* and *Tes115* proteins are 57 and 69 residues in length, respectively. Given the conservation of intron-exon structure, their tandem positioning, and protein similarity, we conclude that *Tes100* and*Tes115* are related through tandem duplication.

The 19.6 kb sequence also contains four *Tes100*/*Tes115* flanking genes that were identified by BLAST analysis to *D. melanogaster*. Covering the immediate 8 kb 5’ of *Tes100*, BLASTp matches were (from 5’ to 3’) to *CG8019* (E = 0.0), *CG6502* (E = 0.0), and *CG8009* (E = 7e-58). The remaining BLASTp match was to *CG6491* (E = 2e-91), 1.3 kb 3’ of *Tes115*. *D. melanogaster-D. mojavensis* microsynteny is preserved for these genes, with part of the microsyntenic region illustrated in Figure A. The candidate region for *D. melanogaster* orthology, between *CG8009* and *CG6491*, is less than 2 kb and contains a single annotated gene, *CG18628*. Like *Tes100* and *Tes115*, *CG18628* CDS contains two exons, with the first at 58 bp in length. *CG18628* protein contains 63 residues and is of intermediate length relative to *Tes100* and *Tes115* proteins. Protein alignments of *Tes100* and *CG18628* are 33.9% similar while *Tes115* and *CG18628* are only 25.4% similar. Thus, our data suggest that the *Tes100*/*Tes115* duplication occurred subsequent to the *D. melanogaster-D. mojavensis* lineage split and that *CG18628* is orthologous to the common ancestor of *Tes100*/*Tes115*. This computational observation is supported by our relative expression analysis, which shows that all three genes are highly testis-enriched (supplementary Table S2; http://www.genetics.org/supplemental).

SUPPLEMENTARY FIGURE LEGENDS

Figure A. Alignment of *D. melanogaster* and *D. mojavensis* microsynteny around the *Tes100*/*115* gene region. Arrows next to genes indicate 5’ to 3’ orientation and dotted arrows between microsyntenic regions indicate significant BLAST similarity.

Supplementary Text 2 Comparison of *D. mojavensis* and *D. melanogaster* expression patterns

Expression patterns of *D. melanogaster* genes reported in supplementary Table S2 (http://www.genetics.org/supplemental) include putative orthologs as well as other possibly related genes and genes with shared domains. First, two *D. melanogaster* genes, *CG1385* and *CG14926*, are included in this analysis despite their low BLAST similarity (E > 1e-03) to *Acp27a* and *Tes101*, respectively. Unlike *Acp27a*, *CG1385* (*Defensin*) is primarily expressed in male non-reproductive tissues (supplementary Table S2; http://www.genetics.org/supplemental). *CG1385* is a Drosophila immune system protein involved in antibacterial defense (Dimarcq *et al.* 1994). If 2-∆∆CT was calculated relative to accessory gland rather than female tissue, *CG1385* fold difference would be 145 rather than 2.82. Clearly *CG1385* is not an accessory gland gene in *D. melanogaster* and we have no reason to suspect orthology, though the protein similarity leaves unanswered questions about the possibility of functional convergence. *Tes101* and *CG14926* present a different situation. Despite their limited BLAST similarity, they are both highly testis-specific in expression. Our population genetic data for *Tes101* covers one intron and is consistent with the intron-exon structure of the alignable portion of *CG14926*. Thus, it is still possible that these genes are orthologous, albeit with significant sequence divergence.

We do not expect gene expression patterns to be similar for all members of a gene family. Three of our *D. mojavensis*-*D. melanogaster* comparisons (*Acp19-CG9538*, *Acp48-CG12172*, and *Tes33-CG5106*) involve genes from large families with shared domains and no evidence of orthology. Only one pair, *Tes33-CG5106*, shows similar, testis-specific expression patterns.

Our remaining gene family comparison (*Acp1-2-25*/*Acp53-*) is smaller and contains no conserved domains. The *D. melanogaster Acp53-* gene family only has four known duplicated members (Holloway and Begun 2004). A protein distance tree generates intraspecific gene clusters, suggesting one-to-one orthologous pairs are unlikely. Thus, it is no more correct to pair our *D. melanogaster Acp53Ea* expression analysis with *Acp25* (supplementary Table S2; http://www.genetics.org/supplemental) than with either *Acp1* or *Acp2*. Just as all three *D. mojavensis* genes are clearly *Acps*, *Acp53Ea* shows clear accessory gland expression. The degree of *Acp53Ea* tissue-specificity (2-∆∆CT = 47.5) is much more similar to *Acp25* (2-∆∆CT = 50.8) than either *Acp1* (2-∆∆CT = 566) or *Acp2* (2-∆∆CT = 933). In fact, there is a significant difference between the 2-∆∆CT scores of *Acp25*/*Acp53Ea* and *Acp1*/*Acp2* (*P* < 0.05).

BLAST analysis shows that the *Acp1-2-25*/*Acp53-* family ranges from four (Holloway and Begun 2004) to seven known tandem duplicates (Wagstaff and Begun 2005) in the only two completely sequenced fly species. Though we cannot be certain how extensive this family is in *D. mojavensis*, it is probably of similar size. Given this apparently small gene family, one might expect that function, and by extension gene expression profiles, would be similar both within and between species. An intriguing finding is that *D. melanogaster Acp53Ea* expression is very similar to *D. mojavensis Acp25* and that *Acp25*/*Acp53Ea* expression patterns are significantly different than *Acp1*/*Acp2* expression patterns (*P* < 0.05). It would be interesting to know if any of the remaining *D. melanogaster Acp53-* genes show increased *Acp* tissue-specificity with expression profiles closer to those of *D. mojavensis Acp1* and *Acp2*.

The remaining *D. mojavensis*-*D. melanogaster* comparisons involve putative orthologous pairs. *D. melanogaster* counterparts to the six *moj-* genes are likewise roughly evenly expressed across tissues, with *CG3654* generating the highest 2-∆∆CT score (2.53). At most, the differences between pairs in highest scoring tissue (see tissue order, supplementary Table S2; http://www.genetics.org/supplemental) might reflect subtle differences between *D. mojavensis*-*D. melanogaster* expression profiles.

Supplementary tables

**Table S1 Quantity and characterization of *D. mojavensis* whole male reproductive tract and testis cDNA libraries**

| Gene/EST | No. Clones | SignalP?a | Top BLAST Hitb | E Score | Secondary Hitc | Testis EST?d | Conserved Domain?e |
| --- | --- | --- | --- | --- | --- | --- | --- |
|  |  |  |  |  |  |  |  |
| Whole male reproductive tract ESTs (1-53): | | | |  |  |  |  |
|  |  |  |  |  |  |  |  |
| *Acp1* | 36 | 1.000 | *CG15616-PA Acp53C14b* | 7E-03 | ---- | no | ---- |
| *Acp2* | 5 | 1.000 | *CG8626-PA Acp53C14a* | 8E-08 | 2E-06 | yes | ---- |
| *Acp3* | 9 | 0.998 | ---- | ---- | ---- | ---- | ---- |
| *Acp4* | 9 | 0.998 | *CG11395-PA* | 8E-08 | ---- | no | ---- |
| *Acp5a* | 36 | 1.000 | ---- | ---- | ---- | ---- | ---- |
| *moj6* | 2 | 0.999 | ---- | ---- | ---- | ---- | ---- |
| *Acp7* | 6 | 1.000 | ---- | ---- | ---- | ---- | ---- |
| *Acp8* | 4 | 1.000 | ---- | ---- | ---- | ---- | ---- |
| *moj9* | 1 | 0.000 | **CG5210-PA Chit* | 9E-87 | 3E-57 | no | Chitinase |
| *moj10* | 1 | 0.003 | *CG8495-PA* | 1E-30 | ---- | yes | Ribosomal protein S14 |
| *Acp11* | 1 | 1.000 | ---- | ---- | ---- | ---- | ---- |
| *moj12* | 1 | 0.000 | *CG7808-PD* | 8E-79 | ---- | yes | Ribosomal protein S8e |
| *moj13* | 2 | 0.002 | ---- | ---- | ---- | ---- | ---- |
| *Tes14* | 1 | 0.000 | *unannotated (protein) | 1E-25 | ---- | no | ---- |
| *Acp15* | 11 | 0.761 | ---- | ---- | ---- | ---- | ---- |
| *Acp16a* | 1 | 0.998 | ---- | ---- | ---- | ---- | ---- |
| *Acp17* | 25 | 1.000 | ---- | ---- | ---- | ---- | ---- |
| *moj18* | 1 | 0.585 | *CG4087-PA RpP2* | 9E-33 | ---- | yes | Ribosomal protein L12E/L44/L45/RPP1/RPP2 |

Table S1 Contd.

| Gene/EST | No. Clones | SignalP?a | Top BLAST Hitb | E Score | Secondary Hitc | Testis EST?d | Conserved Domain?e |
| --- | --- | --- | --- | --- | --- | --- | --- |
|  |  |  |  |  |  |  |  |
| *Acp19* | 1 | 0.986 | *CG9540-PA Ag5r* | 5E-11 | 1E-10 | yes | SCP |
| *moj20* | 2 | 0.998 | ---- | ---- | ---- | ---- | ---- |
| *Acp21a* | 7 | 0.989 | ---- | ---- | ---- | ---- | ---- |
| *Acp22* | 1 | 1.000 | ---- | ---- | ---- | ---- | ---- |
| *Acp23* | 3 | 1.000 | ---- | ---- | ---- | ---- | ---- |
| *Acp24* | 1 | 1.000 | ---- | ---- | ---- | ---- | ---- |
| *Acp25* | 1 | 0.998 | *CG8622-PA Acp53Ea* | 4E-03 | ---- | no | ---- |
| *Acp27a* | 1 | 1.000 | *CG1385-PA Def* | 5E-03 | ---- | no | ---- |
| *Acp27b* | 1 | 1.000 | ---- | ---- | ---- | ---- | ---- |
| *moj28* | 1 | 0.000 | unannotated (nucleotide) | 1E-139 | ---- | yes | ---- |
| *moj29* | 2 | 0.998 | **CG2852-PA* | 3E-84 | 3E-37 | yes | pro isomerase |
| *moj30* | 1 | 0.931 | **CG8460-PA* | 9E-72 | ---- | no | Glycosyl hydrolase |
| *Tes31* | 1 | 0.544 | **CG4523-PB* | 2E-25 | ---- | yes | ---- |
| *moj32* | 1 | 0.012 | **CG3654-PD* | 8E-32 | ---- | no | ---- |
| *Tes33* | 1 | 0.999 | *CG17210-PA* | 1E-103 | 1E-103 | yes | SCP |
| *moj34* | 2 | N/A | *CR40456-RA 18SRNA* | 3E-47 | ---- | yes | N/A |
| *moj35* | 1 | N/A | ---- | ---- | ---- | ---- | ---- |
| *Acp36* | 1 | 0.996 | **CG16713-PA* | 2E-25 | 4E-19 | yes | Kunitz family of serine protease inhibitors |
| *moj37* | 1 | 1.000 | *CG6113-PA* | 5E-82 | 6E-54 | no | ab-hydro lipase |
| *moj38* | 1 | 0.000 | *CG8332-PA* | 2E-63 | ---- | no | Ribosomal protein S19 |
| *Tes39* | 1 | 0.000 | **CG3450-PA* | 9E-39 | ---- | no | Ubiquitin |
| *Tes40* | 1 | 0.000 | **CG9828-PA* | 2E-56 | 3E-18 | yes | DnaJ-class molecular chaperone with C-terminal Zn finger domain |
| *Tes41* | 1 | 0.005 | **CG5968-PA* | 5E-32 | 4E-04 | yes | ---- |

Table S1 Contd.

| Gene/EST | No. Clones | SignalP?a | Top BLAST Hitb | E Score | Secondary Hitc | Testis EST?d | Conserved Domain?e |
| --- | --- | --- | --- | --- | --- | --- | --- |
|  |  |  |  |  |  |  |  |
| *Acp42* | 1 | 0.996 | ---- | ---- | ---- | ---- | ---- |
| *moj43* | 1 | 0 | *CG3922-PB RpS17* | 1.00E-53 | ---- | no | Ribosomal protein S17E |
| *moj44* | 1 | 0.976 | *CG1652-PA lectin-46Cb* | 1.00E-67 | 2.00E-43 | yes | C-type lectin |
| *Acp45* | 1 | 1 | ---- | ---- | ---- | ---- | ---- |
| *moj46* | 1 | 0.998 | *CG15168-PA* | 2.00E-23 | ---- | no | ---- |
| *moj47* | 1 | N/A | ---- | ---- | ---- | ---- | ---- |
| *Acp48* | 1 | 0.876 | *CG12172-PA Spn43Aa* | 2.00E-03 | ---- | no | Serpin (serine protease inhibitor) |
| *moj49* | 1 | 0.007 | *CG9538-PA Ag5r* | 3.00E-45 | 2.00E-39 | yes | SCP |
| *moj50* | 2 | 0 | *CR40456-RA 18SRNA* | 3.00E-83 | ---- | yes | ---- |
| *moj51* | 1 | 0.02 | *CG6105-PA* | 6.00E-48 | 2.00E-24 | yes | Mitochondrial ATP synthase g subunit |
| *moj52* | 1 | 0 | *CG14708-PA* | 2.00E-20 | 3.00E-13 | no | ---- |
| *moj53* | 1 | N/A | *CR40456-RA 18SRNA* | 1.00E-148 | ---- | yes | N/A |
| *Acp54* | 1 | 0.999 | ---- | ---- | ---- | ---- | ---- |
|  |  |  |  |  |  |  |  |
| Testis ESTs (100-217): | | | |  |  |  |  |
|  |  |  |  |  |  |  |  |
| *Tes100* | 20 | 1 | ---- | ---- | ---- | ---- | ---- |
| *Tes101* | 2 | 0 | *CG14926-PA* | 6.00E-03 | ---- | yes | ---- |
| *moj102* | 1 | 0.044 | unannotated (protein) | 3.00E-10 | ---- | yes | ---- |
| *moj103* | 1 | N/A | ---- | ---- | ---- | ---- | ---- |
| *Tes104* | 2 | 1 | *CG5106-PA* | 1.00E-114 | 1.00E-114 | yes | SCP |
| *Tes105* | 1 | 0 | **CG16972-PA* | 6.00E-14 | ---- | no | ---- |
| *Tes106* | 1 | 0 | **CG30334-PA* | 7.00E-10 | ---- | yes | ---- |
| *Tes107* | 2 | 0.014 | **CG31740-PA* | 2.00E-06 | ---- | yes | ---- |
| *Tes108* | 2 | 0.001 | ---- | ---- | ---- | ---- | ---- |

Table S1 Contd.

| Gene/EST | No. Clones | SignalP?a | Top BLAST Hitb | E Score | Secondary Hitc | Testis EST?d | Conserved Domain?e |
| --- | --- | --- | --- | --- | --- | --- | --- |
|  |  |  |  |  |  |  |  |
| *Tes109* | 1 | 0.000 | *CG6209-PA* | 7E-04 | 3E-03 | yes | ---- |
| *Tes110* | 4 | 0.000 | **CG15219-PA* | 3E-05 | ---- | yes | ---- |
| *Tes111* | 2 | 0.583 | **CG31226-PB* | 2E-07 | 5E-04 | yes | ---- |
| *Tes112* | 1 | 0.098 | ---- | ---- | ---- | ---- | ---- |
| *Tes113* | 1 | 0.000 | ---- | ---- | ---- | ---- | ---- |
| *Tes114* | 1 | 0.000 | *CG5144-PA* | 3E-10 | 1E-07 | yes | ATP: guanido phosphotransferase |
| *Tes115* | 9 | 1.000 | ---- | ---- | ---- | ---- | ---- |
| *moj116* | 1 | 0.003 | *CG6372-PA* | 9E-53 | 7E-50 | yes | Leucyl aminopeptidase |
| *moj117* | 2 | N/A | unannotated (nucleotide) | 1E-131 | ---- | no | N/A |
| *Tes118* | 3 | 0.038 | *unannotated (protein) | 3E-12 | ---- | no | ---- |
| *moj119* | 1 | N/A | ---- | ---- | ---- | ---- | ---- |
| *Tes120* | 1 | 0.000 | *CG5024-PA* | 3E-49 | 1E-41 | yes | EF-Hand superfamily |
| *moj121* | 1 | N/A | ---- | ---- | ---- | ---- | ---- |
| *Tes122* | 1 | 0.044 | **CG7625-PA VhaM9.7-2* | 3E-44 | 2E-20 | yes | ---- |
| *Tes123* | 1 | 0.025 | *CG8174-PC SRPK* | 6E-13 | 5E-12 | yes | Serine/Threonine protein kinases |
| *Tes124* | 1 | 0.000 | **CG14079-PA* | 1E-14 | ---- | no | ---- |
| *moj125* | 1 | 0.002 | *CG5048-PA* | 2E-33 | ---- | yes | ---- |
| *moj126* | 1 | N/A | ---- | ---- | ---- | ---- | ---- |
| *Tes127* | 1 | 0.521 | **CG10090-PA Tim17a1* | 2E-07 | 6E-05 | no | ---- |
| *moj128* | 1 | N/A | ---- | ---- | ---- | ---- | ---- |
| *Tes129* | 1 | 0.000 | **CG3708-PA* | 4E-32 | 3E-18 | yes | Nucleosome assembly protein |
| *Tes130* | 1 | 0.000 | ---- | ---- | ---- | ---- | ---- |
| *Tes131* | 1 | 0.000 | **CG4218-PA* | 3E-25 | ---- | yes | ---- |
| *moj132* | 1 | 0.000 | *CG4651-PA RpL13* | 3E-92 | ---- | no | Ribosomal protein L13E |

Table S1 Contd.

| Gene/EST | No. Clones | SignalP?a | Top BLAST Hitb | E Score | Secondary Hitc | Testis EST?d | Conserved Domain?e |
| --- | --- | --- | --- | --- | --- | --- | --- |
|  |  |  |  |  |  |  |  |
| *Tes133* | 1 | 0.000 | **CG14346-PA* | 1E-43 | ---- | no | ---- |
| *Tes134* | 2 | 0.000 | **CG33189-PA* | 3E-21 | 3E-04 | yes | ---- |
| *moj135* | 1 | N/A | unannotated (nucleotide) | 6E-06 | ---- | no | N/A |
| *moj136* | 1 | N/A | ---- | ---- | ---- | ---- | ---- |
| *moj137* | 1 | 0.000 | **CG6773-PA sec13* | 1E-41 | 3E-17 | no | WD40 domain |
| *moj138* | 1 | 0.024 | *CG32267-PA* | 8E-04 | ---- | yes | ---- |
| *moj139* | 1 | 0.000 | *CG8138-PA* | 5E-04 | ---- | no | ---- |
| *Tes140* | 1 | 0.931 | **CG12163-PD* | 3E-16 | ---- | yes | ---- |
| *moj141* | 1 | N/A | ---- | ---- | ---- | ---- | ---- |
| *moj142* | 1 | N/A | ---- | ---- | ---- | ---- | ---- |
| *moj143* | 1 | 0.017 | *CG31916-PA* | 1E-25 | 2E-05 | no | ---- |
| *moj144* | 1 | N/A | ---- | ---- | ---- | ---- | ---- |
| *moj145* | 1 | 0.005 | *CG1913-PA alphaTub84B* | 2E-94 | 3E-94 | yes | Tubulin/FtsZ |
| *moj146* | 1 | N/A | ---- | ---- | ---- | ---- | ---- |
| *moj147* | 1 | 0.000 | *CG2980-PA* | 3E-56 | ---- | no | ---- |
| *moj148* | 1 | 0.000 | *CG11840-PA shanti* | 4E-26 | ---- | yes | ---- |
| *moj149* | 1 | N/A | ---- | ---- | ---- | ---- | ---- |
| *moj150* | 1 | 0.983 | *CG15369-PA* | 6E-26 | 2E-21 | yes | Cystatin-like |
| *moj151* | 1 | 0.021 | *CG12438-PA* | 2E-20 | ---- | no | ---- |
| *moj152* | 1 | 0.043 | **CG9941-PA* | 1E-18 | ---- | no | ---- |
| *moj153* | 1 | N/A | ---- | ---- | ---- | ---- | ---- |
| *Tes154* | 3 | 0.008 | **CG10252-PA* | 9E-61 | 4E-06 | yes | ---- |
| *moj155* | 1 | N/A | ---- | ---- | ---- | ---- | ---- |
| *moj156* | 1 | N/A | ---- | ---- | ---- | ---- | ---- |

Table S1 Contd.

| Gene/EST | No. Clones | SignalP?a | Top BLAST Hitb | E Score | Secondary Hitc | Testis EST?d | Conserved Domain?e |
| --- | --- | --- | --- | --- | --- | --- | --- |
|  |  |  |  |  |  |  |  |
| *moj157* | 2 | 0.000 | ---- | ---- | ---- | ---- | ---- |
| *moj158* | 1 | N/A | ---- | ---- | ---- | ---- | ---- |
| *moj159* | 1 | N/A | ---- | ---- | ---- | ---- | ---- |
| *moj160* | 1 | N/A | ---- | ---- | ---- | ---- | ---- |
| *moj161* | 1 | 0.001 | *CG1827-PA* | 7E-21 | 2E-13 | no | Asparaginase |
| *moj162* | 1 | 0.000 | *CG5614-PA* | 2E-12 | ---- | yes | LisH, Lissencephaly type-1-like homology motif |
| *moj163* | 2 | N/A | ---- | ---- | ---- | ---- | ---- |
| *moj164* | 1 | N/A | unannotated (nucleotide) | 2E-12 | ---- | yes | N/A |
| *moj165* | 1 | N/A | *CG17567-RB* | 8E-04 | 7E-03 | no | N/A |
| *moj166* | 1 | 0.992 | *CG8189-PA ATPsyn-b* | 6E-75 | 1E-17 | yes | Mitochondrial ATP synthase B chain precursor (ATP-synt B) |
| *moj167* | 1 | 0.013 | unannotated (protein) | 5E-04 | ---- | no | ---- |
| *moj168* | 1 | N/A | ---- | ---- | ---- | ---- | ---- |
| *moj169* | 1 | N/A | ---- | ---- | ---- | ---- | ---- |
| *moj170* | 1 | N/A | ---- | ---- | ---- | ---- | ---- |
| *moj171* | 1 | 0.000 | *CG8006-PA* | 5E-23 | 2E-10 | yes | ---- |
| *moj172* | 1 | N/A | ---- | ---- | ---- | ---- | ---- |
| *moj173* | 1 | 0.381 | *CG13245-PA* | 8E-22 | ---- | yes | ---- |
| *moj174* | 1 | N/A | *CG9007-RA* | 2E-03 | ---- | no | N/A |
| *moj175* | 1 | 0.000 | *CG4692-PA* | 5E-59 | 1E-12 | yes | ---- |
| *moj176* | 1 | N/A | ---- | ---- | ---- | ---- | ---- |
| *moj177* | 1 | 0.000 | *CG1728-PA Tim8* | 2E-43 | 6E-08 | yes | Tim10/DDP family zinc finger |
| *moj178* | 1 | N/A | ---- | ---- | ---- | ---- | ---- |
| *moj179* | 1 | N/A | ---- | ---- | ---- | ---- | ---- |

Table S1 Contd.

| Gene/EST | No. Clones | SignalP?a | Top BLAST Hitb | E Score | Secondary Hitc | Testis EST?d | Conserved Domain?e |
| --- | --- | --- | --- | --- | --- | --- | --- |
|  |  |  |  |  |  |  |  |
| *moj180* | 1 | 0.000 | *CG31345-PA* | 2E-65 | 7E-57 | yes | EF-hand, calcium binding motif |
| *moj181* | 1 | N/A | *CG8397-RA* | 1E-05 | ---- | no | N/A |
| *moj182* | 1 | 0.000 | *CG8309-PA* | 4E-04 | ---- | no | N/A |
| *moj183* | 1 | N/A | ---- | ---- | ---- | ---- | ---- |
| *moj184* | 1 | 0.000 | *CG13917-PA* | 3E-36 | ---- | no | ---- |
| *moj185* | 1 | N/A | ---- | ---- | ---- | ---- | ---- |
| *moj186* | 1 | 0.000 | *CG8989-PB His3.3B* | 2E-71 | 2E-71 | yes | Histone H3 |
| *moj187* | 1 | N/A | ---- | ---- | ---- | ---- | ---- |
| *moj188* | 1 | 0.352 | *CG14724-PB CoVa* | 1E-71 | ---- | yes | Cytochrome c oxidase subunit Va |
| *moj189* | 1 | 0.002 | *CG4750-PA* | 4E-46 | 5E-44 | yes | Peptidase M17 |
| *moj190* | 1 | N/A | ---- | ---- | ---- | ---- | ---- |
| *moj191* | 1 | 0.136 | *CG8226-PA* | 7E-07 | ---- | yes | ---- |
| *moj192* | 1 | N/A | ---- | ---- | ---- | ---- | ---- |
| *moj193* | 1 | 1.000 | *CG11314-PA* | 4E-18 | 2E-17 | no | ML (MD-2-related lipid-recognition) |
| *moj194* | 1 | N/A | *CG5273-PB* | 2E-05 | 5E-04 | no | N/A |
| *moj195* | 1 | 0.000 | *CG15693-PA RpS20* | 9E-63 | ---- | yes | Ribosomal protein S10p/S20e |
| *moj196* | 1 | 0.000 | *CG5762-PA* | 9E-32 | ---- | yes | ---- |
| *moj197* | 1 | N/A | ---- | ---- | ---- | ---- | ---- |
| *moj198* | 1 | N/A | ---- | ---- | ---- | ---- | ---- |
| *moj199* | 1 | 0.000 | *CG13364-RA* | 2E-27 | ---- | no | ---- |
| *moj200* | 1 | N/A | ---- | ---- | ---- | ---- | ---- |
| *moj201* | 1 | 0.000 | *CG14684-PA* | 2E-14 | ---- | no | ---- |
| *moj202* | 1 | N/A | ---- | ---- | ---- | ---- | ---- |
| *moj203* | 1 | N/A | ---- | ---- | ---- | ---- | ---- |

Table S1 Contd.

| Gene/EST | No. Clones | SignalP?a | Top BLAST Hitb | E Score | Secondary Hitc | Testis EST?d | Conserved Domain?e |
| --- | --- | --- | --- | --- | --- | --- | --- |
|  |  |  |  |  |  |  |  |
| *moj204* | 1 | 0.000 | *CG14648-PA* | 1E-05 | ---- | no | ---- |
| *moj205* | 1 | 0.318 | *CG11858-PA* | 1E-16 | ---- | no | N/A |
| *moj206* | 1 | 0.026 | *CG17736-PA* | 1E-07 | ---- | yes | N/A |
| *moj207* | 1 | N/A | ---- | ---- | ---- | ---- | ---- |
| *moj208* | 1 | 0.000 | *CG2034-PA* | 1E-22 | ---- | yes | N/A |
| *moj209* | 1 | 0.008 | *CG5184-PA mRpS11* | 4E-85 | 5E-06 | no | RpsK, Ribosomal protein S11 |
| *moj210* | 1 | N/A | ---- | ---- | ---- | ---- | ---- |
| *moj211* | 1 | N/A | ---- | ---- | ---- | ---- | ---- |
| *moj212* | 1 | N/A | ---- | ---- | ---- | ---- | ---- |
| *moj213* | 1 | 0.141 | *CG13601-PA* | 3E-08 | 5E-03 | yes | ---- |
| *moj214* | 1 | N/A | ---- | ---- | ---- | ---- | ---- |
| *moj215* | 1 | N/A | ---- | ---- | ---- | ---- | ---- |
| *moj216* | 1 | N/A | ---- | ---- | ---- | ---- | ---- |
| *moj217* | 1 | N/A | ---- | ---- | ---- | ---- | ---- |
|  |  |  |  |  |  |  |  |

aIndicates hidden Markov model signal peptide probabilities (Nielsen and Krogh 1998; Bendtsen *et al.* 2004). N/A indicates that no SignalP analysis was performed because representative EST sequences were either truncated or had unknown ORFs.

bUnannotatd BLAST matches are characterized as protein or nucleotide, as dictated by the type of sequence that returned the lowest E score. Putative orthologous matches are indicated by an * (see text for the subset of genes that was scrutinized for orthology).

cIndicates whether or not BLAST searches returned more than one homologous sequence.

dIndicates significant match (E < 1e-04) to *D. melanogaster* testis EST database (Andrews *et al.* 2000).

eThe NCBI CDD database (Marchler-Bauer *et al.* 2003) was used for conserved domain analysis. Sequences corresponding to no known protein or highly truncated proteins are designated "N/A" as no CDD analysis was performed.

**Table S2 Quantitative PCR Data for *D. mojavensis* and Related *D. melanogaster*** Genes

| Gene | ∆CT | Fold Difference Relative to Second Most Abundant Tissue Templatea | | | Tissue Orderb |
| --- | --- | --- | --- | --- | --- |
| 2-∆∆CT | Third Tissue | Least Abundant |
|  |  |  |  |  |  |
| *Acp1* | -7.31 | 566.18 | 3.4E-03 | 2.2E-04 | ATCF |
| *Acp2* | -5.14 | 932.81 | 3.1E-03 | ---- | ATC |
| *Acp3* | -8.85 | 348.40 | 2.7E-03 | 9.6E-05 | ATCF |
| *Acp5a* | -7.34 | 817.39 | 2.3E-03 | 1.7E-04 | ATCF |
| *Acp7* | -7.73 | 416.40 | 1.3E-02 | 1.9E-03 | ATCF |
| *Acp8* | -1.60 | 104.29 | 2.1E-03 | ---- | ATC |
| *Acp11* | -7.62 | 578.07 | 4.4E-03 | 2.2E-04 | ATCF |
| *Acp16a* | 0.01 | 64.91 | 1.9E-03 | ---- | ATC |
| *Acp19* | -6.55 | 602.63 | 4.6E-03 | 2.4E-03 | ATFC |
| *mel - CG9538*d,e | 1.89 | 6.36 | 1.2E-02 | 5.4E-03 | CFTA |
| *Acp21a* | 0.11 | 72.82 | 3.8E-03 | ---- | ATC |
| *Acp22* | 5.06 | 66.60 | 8.9E-02 | 2.7E-02 | ATCF |
| *Acp24* | -0.12 | 90.51 | 2.5E-03 | 4.7E-04 | ATCF |
| *Acp25* | 1.92 | 50.81 | ---- | ---- | AT |
| *mel - Acp53Ea*d | -1.24 | 47.54 | 1.2E-02 | 1.2E-04 | ATCF |
| *Acp27a* | 3.24 | 90.57 | 3.0E-02 | ---- | ATC |
| *mel - CG1385*f | 2.27 | 2.82 | 1.9E-02 | 5.3E-03 | CFAT |
| *Acp27b* | 0.95 | 78.10 | 8.0E-02 | 1.7E-02 | ATCF |
| *Acp42* | -4.13 | 87.95 | 1.5E-03 | 6.1E-05 | ATCF |
| *Acp45* | -5.47 | 663.23 | 8.1E-03 | ---- | ATC |
| *Acp48* | -5.07 | 22.27 | 1.9E-04 | ---- | ATC |
| *mel - CG12172*d,e | 6.76 | 13.63 | 3.5E-01 | 2.4E-01 | TFAC |
| *Acp54* | -2.64 | 124.86 | ---- | ---- | AT |
| *moj9* | -2.54 | 1.88 | 1.9E-01 | 1.7E-01 | TCFA |
| *mel - CG5210*c,d,e | 3.71 | 2.15 | 4.2E-01 | 5.5E-02 | CFTA |
| *moj29* | -1.34 | 2.52 | 6.4E-01 | 5.1E-01 | ATCF |
| *mel - CG2852*c,d,e | 3.56 | 1.94 | 9.1E-01 | 4.5E-01 | TAFC |
| *moj30* | 5.86 | 1.72 | 3.5E-01 | 2.5E-01 | ATCF |
| *mel - CG8460*c,e | 6.40 | 1.74 | 7.0E-01 | 3.2E-01 | TAFC |
| *moj32* | 4.07 | 2.61 | 6.1E-01 | 5.2E-01 | TFAC |
| *mel - CG3654*c | 14.64 | 2.53 | 4.4E-01 | 1.2E-01 | FCTA |
| *moj137* | 0.87 | 1.97 | 3.1E-01 | 3.0E-01 | TACF |
| *mel - CG6773*c,d,e | 9.77 | 1.21 | 5.3E-01 | 4.9E-01 | ATCF |

Table S2 Contd.

| Gene | ∆CT | Fold Difference Relative to Second Most Abundant Tissue Templatea | | | Tissue Orderb |
| --- | --- | --- | --- | --- | --- |
| 2-∆∆CT | Third Tissue | Least Abundant |
|  |  |  |  |  |  |
| *moj152* | 5.24 | 3.50 | 7.9E-01 | 6.8E-01 | TFCA |
| *mel - CG9941*c | 12.63 | 2.12 | 9.4E-01 | 1.3E-01 | FTCA |
| *Tes14* | -0.38 | 18.40 | 7.2E-01 | 2.1E-01 | TACF |
| *mel* - unannotatedc | 2.43 | 4.04 | 8.3E-01 | 5.5E-01 | TCAF |
| *mel - CG8446*g | 7.00 | 1.61 | 5.7E-01 | 1.2E-01 | CTFA |
| *Tes31* | 1.61 | 8.00 | 4.3E-01 | 2.4E-01 | TCFA |
| *mel - CG4523*c | 5.38 | 2.11 | 4.9E-01 | 3.9E-01 | TCFA |
| *Tes33* | -5.29 | 18511.77 | 8.2E-01 | 3.5E-01 | TCAF |
| *mel - CG5106*d,e | -1.59 | 2303.03 | 7.5E-01 | 4.5E-02 | TCFA |
| *Tes39* | 3.18 | 5.12 | 9.5E-01 | 7.9E-01 | TCFA |
| *mel - CG3450*c,e | 4.50 | 3.95 | 8.6E-01 | 8.4E-01 | TAFC |
| *Tes40* | -1.30 | 96.73 | 5.4E-01 | 1.3E-01 | TFCA |
| *mel - CG9828*c,d,e | 5.63 | 14.89 | 2.8E-01 | 2.5E-01 | TCAF |
| *Tes41* | 1.10 | 3797.63 | 6.4E-01 | 2.6E-01 | TCFA |
| *mel - CG5968*c | 2.98 | 5252.83 | 1.0E+00 | 2.8E-01 | TCAF |
| *Tes115* | -5.04 | 692.07 | 5.3E-03 | 9.0E-03 | TACF |
| *Tes100* | -4.17 | 478.55 | 1.2E-02 | 6.5E-03 | TACF |
| *mel - CG18628*c | -2.76 | 348.84 | 1.7E-01 | 5.3E-03 | TAFC |
| *Tes101* | -3.69 | 36656.46 | 5.9E-01 | ---- | TAC |
| *mel - CG14926*f | -2.55 | 2868.81 | 2.1E-01 | 9.1E-03 | TACF |
| *Tes104* | -3.16 | 23873.76 | 6.3E-01 | 6.1E-01 | TCAF |
| *Tes105* | -2.36 | 315.80 | 5.4E-01 | 3.0E-01 | TFCA |
| *mel - CG16972*c | -0.40 | 74.59 | 4.0E-01 | 3.2E-01 | TFCA |
| *Tes106* | -2.51 | 20104.52 | 3.8E-01 | ---- | TAC |
| *mel - CG30334*c | 1.89 | 207.88 | 4.6E-01 | 5.4E-02 | TCFA |
| *Tes107* | -0.65 | 34588.46 | 7.4E-01 | ---- | TAC |
| *mel - CG31740*c | 1.11 | 43993.04 | 7.0E-01 | ---- | TAC |
| *Tes108* | -3.85 | 92768.67 | 1.0E+00 | 2.1E-01 | TACF |
| *Tes109* | -4.80 | 9915.91 | 9.9E-01 | 2.7E-01 | TFAC |
| *Tes110* | -5.36 | 214980.12 | 1.0E+00 | ---- | TAC |
| *mel - CG15219*c | -3.42 | 9052.73 | 3.7E-01 | 3.8E-02 | TACF |
| *Tes111* | -4.43 | 10951.10 | 2.5E-01 | 2.3E-01 | TACF |
| *mel - CG31226*c | 0.09 | 14969.73 | 8.4E-02 | ---- | TAC |
| *Tes112* | -4.44 | 30746.30 | 2.8E-01 | 1.4E-01 | TACF |

Table S2 Contd.

| Gene | ∆CT | Fold Difference Relative to Second Most Abundant Tissue Templatea | | | Tissue Orderb |
| --- | --- | --- | --- | --- | --- |
| 2-∆∆CT | Third Tissue | Least Abundant |
|  |  |  |  |  |  |
| *Tes113* | -6.04 | 10789.56 | 6.2E-01 | 4.9E-01 | TACF |
| *Tes114* | -1.49 | 954.76 | 8.9E-01 | 2.9E-01 | TACF |
| *Tes118* | -2.01 | 23131.32 | 1.2E-01 | ---- | TAC |
| *Tes120* | 1.38 | 4182.25 | ---- | ---- | TA |
| *Tes122* | 0.71 | 5.10 | 6.2E-01 | 5.9E-01 | TCAF |
| *mel - CG7625*c,d | 7.28 | 2.88 | 8.5E-01 | 6.0E-01 | TCAF |
| *Tes123* | -2.13 | 17695.50 | 3.7E-01 | ---- | TCA |
| *Tes124* | 4.82 | 514.99 | 1.0E+00 | 9.9E-01 | TACF |
| *mel - CG14079*c | 16.17 | 85.38 | ---- | ---- | TF |
| *Tes127* | -1.56 | 177.69 | 6.8E-01 | 3.6E-01 | TCAF |
| *mel - CG10090*c,d | 5.45 | 9463.99 | 1.0E+00 | 6.2E-01 | TACF |
| *Tes129* | 0.39 | 23.80 | 3.6E-01 | 2.5E-01 | TFCA |
| *mel - CG3708*c,d,e | 5.38 | 3898.51 | 6.2E-01 | 4.9E-01 | TACF |
| *Tes130* | 2.73 | 298.98 | 9.9E-01 | 7.3E-01 | TACF |
| *Tes131* | -3.11 | 14202.18 | 7.3E-01 | 3.0E-01 | TCAF |
| *mel - CG4218*c | 1.69 | 28882.82 | 4.0E-01 | ---- | TAC |
| *Tes133* | 3.71 | 16393.88 | ---- | ---- | TF |
| *mel - CG14346*c | 5.88 | 34022.18 | 1.0E+00 | ---- | TAC |
| *Tes134* | 3.67 | 147.97 | 4.7E-01 | 4.6E-01 | TCFA |
| *mel - CG33189*c | 2.45 | 1451.89 | 2.1E-01 | 1.1E-01 | TCAF |
| *Tes140* | -0.28 | 525.25 | 9.8E-01 | 5.5E-01 | TFAC |
| *mel - CG12163*c | 2.62 | 772.72 | 8.1E-01 | 2.0E-01 | TCAF |
| *Tes154* | -3.08 | 7690.17 | 2.2E-01 | 1.6E-01 | TCAF |
| *mel - CG10252*c,d | -3.13 | 7667.65 | 2.4E-01 | 8.9E-03 | TACF |
|  |  |  |  |  |  |

aThe fold score of the second most abundant tissue is not shown since, by rule, it must always be equal to one.

bTissues are listed according to levels of expression, most abundant tissue first. A = accessory gland, T = testis, C = male carcass (minus reproductive tracts), and F = whole female tissue.

cPutative *D. melanogaster* ortholog.

dPart of a Gene Family.

eContains a shared protein domain.

fToo divergent to be certain about orthology.

gGene corresponds to an alternate splice of the same genomic sequence (see supplementary materials [http://www.genetics.org/supplemental] for details).

**Table S3 Genetic Differentiation Between *D. m. baja* and *D. m. mojavensis***

| Gene | *D. m. baja* vs. *D. m. mojavensis* | | |  | *D. m. baja* | |  | *D. m. mojavensis* | |
| --- | --- | --- | --- | --- | --- | --- | --- | --- | --- |
| FST | Ka | Ks |  | rep. | syn. |  | rep. | syn. |
|  |  |  |  |  |  |  |  |  |  |
| *Acp1* | 0.000 | 0.005 | 0.030 |  | 0.005 | 0.025 |  | 0.003 | 0.004 |
| *Acp2* | 0.038 | 0.019 | 0.018 |  | 0.019 | 0.031 |  | 0.015 | 0.012 |
| *Acp3* | 0.000 | 0.000 | 0.015 |  | 0.007 | 0.000 |  | 0.023 | 0.000 |
| *Acp5* | -0.019 | 0.019 | 0.000 |  | 0.018 | 0.000 |  | 0.019 | 0.000 |
| *Acp7* | 0.864 | 0.020 | 0.006 |  | 0.000 | 0.000 |  | 0.002 | 0.011 |
| *Acp8* | 0.087 | 0.013 | 0.016 |  | 0.011 | 0.022 |  | 0.013 | 0.000 |
| *Acp16a* | 0.276 | 0.064 | 0.000 |  | 0.083 | 0.005 |  | 0.008 | 0.000 |
| *Acp16b* | 0.000 | 0.006 | 0.031 |  | 0.007 | 0.000 |  | 0.007 | 0.065 |
| *Acp19* | -0.200 | 0.003 | 0.008 |  | 0.003 | 0.012 |  | 0.005 | 0.006 |
| *Acp21* | 0.407 | 0.032 | 0.007 |  | 0.026 | 0.000 |  | 0.010 | 0.014 |
| *Acp24* | 0.000 | 0.019 | 0.029 |  | 0.016 | 0.045 |  | 0.022 | 0.000 |
| *Acp25* | 0.190 | 0.003 | 0.012 |  | 0.000 | 0.014 |  | 0.003 | 0.009 |
| *Acp27* | 0.364 | 0.009 | 0.011 |  | 0.008 | 0.017 |  | 0.000 | 0.000 |
| *Acp42* | 0.370 | 0.003 | 0.039 |  | 0.002 | 0.025 |  | 0.005 | 0.008 |
| *Acp48* | 0.057 | 0.004 | 0.012 |  | 0.005 | 0.019 |  | 0.002 | 0.006 |
| *moj9* | 0.138 | 0.001 | 0.018 |  | 0.003 | 0.024 |  | 0.000 | 0.006 |
| *moj30* | 0.076 | 0.005 | 0.042 |  | 0.007 | 0.045 |  | 0.003 | 0.047 |
| *Tes14* | 0.118 | 0.000 | 0.012 |  | 0.000 | 0.000 |  | 0.000 | 0.024 |
| *Tes33* | 0.173 | 0.002 | 0.038 |  | 0.001 | 0.029 |  | 0.002 | 0.041 |
| *Tes100* | -0.075 | 0.006 | 0.025 |  | 0.005 | 0.030 |  | 0.010 | 0.020 |
| *Tes101* | -0.200 | 0.002 | 0.000 |  | 0.004 | 0.000 |  | 0.000 | 0.000 |
| *Tes104* | 0.370 | 0.000 | 0.016 |  | 0.000 | 0.014 |  | 0.000 | 0.009 |
| *Tes105* | 0.111 | 0.004 | 0.009 |  | 0.003 | 0.009 |  | 0.008 | 0.012 |
| *Tes106* | 0.133 | 0.005 | 0.048 |  | 0.006 | 0.027 |  | 0.004 | 0.031 |
| *Tes107* | -0.060 | 0.000 | 0.021 |  | 0.000 | 0.027 |  | 0.000 | 0.021 |
| *Tes109* | 0.000 | 0.006 | 0.007 |  | 0.009 | 0.013 |  | 0.003 | 0.000 |
| *Tes110* | 0.338 | 0.003 | 0.000 |  | 0.003 | 0.000 |  | 0.000 | 0.000 |
| *Tes112* | 0.056 | 0.000 | 0.032 |  | 0.000 | 0.032 |  | 0.000 | 0.032 |
| *Tes113* | -0.182 | 0.002 | 0.023 |  | 0.002 | 0.030 |  | 0.003 | 0.021 |
| *Tes114* | 0.387 | 0.000 | 0.032 |  | 0.000 | 0.000 |  | 0.000 | 0.032 |
| *Tes115* | 0.000 | 0.002 | 0.000 |  | 0.000 | 0.000 |  | 0.004 | 0.000 |

Table S3 Contd.

| Gene | *D. m. baja* vs. *D. m. mojavensis* | | |  | *D. m. baja* | |  | *D. m. mojavensis* | |
| --- | --- | --- | --- | --- | --- | --- | --- | --- | --- |
| FST | Ka | Ks |  | rep. | syn. |  | rep. | syn. |
|  |  |  |  |  |  |  |  |  |  |
| *Tes118* | -0.030 | 0.002 | 0.010 |  | 0.001 | 0.018 |  | 0.005 | 0.000 |
| *Tes134* | 0.377 | 0.005 | 0.004 |  | 0.004 | 0.005 |  | 0.002 | 0.000 |
| *Tes154* | 0.314 | 0.003 | 0.019 |  | 0.001 | 0.016 |  | 0.000 | 0.022 |
|  |  |  |  |  |  |  |  |  |  |
|  |  |  |  |  |  |  |  |  |  |
| all *Acps* | 0.168 | 0.011 | 0.015 |  | 0.009 | 0.014 |  | 0.006 | 0.009 |
| all *Tes* | 0.144 | 0.003 | 0.013 |  | 0.002 | 0.015 |  | 0.002 | 0.014 |
| all genes | 0.150 | 0.006 | 0.015 |  | 0.005 | 0.016 |  | 0.004 | 0.013 |
|  |  |  |  |  |  |  |  |  |  |
